# Supplementary material for: Bidirectional effect of vitamin D on brown adipogenesis of C3H10T1/2 fibroblast-like cells
Source: PeerJ. 2023 Jan 31;11:e14785. doi: 10.7717/peerj.14785 (PMC9934812; doi:10.7717/peerj.14785)
Supplement: Supplemental Information 1 [file peerj-11-14785-s001.xlsx]

## Sheet: Figure 1
Raw data of relative expression of Fabp4
	0day	2day	4day	6day	8day
1	0.934914	1125.57	3582.1	5207.92	4623.4
2	0.981957	1110.83	3422.69	5392.69	4409.91
3	1.01924	1084.74	3649.84	6082.96	4734.41
4	1.06389	1120.81	3502.28	5862.13	4914.99
Raw data of relative expression of Ucp1
	0day	2day	4day	6day	8day
1	0.950231	0.718166	2.09561	29.9496	90.3069
2	1.30313	0.652037	3.10937	29.1342	82.3089
3	1.09025	0.457109	2.31502	27.9345	93.8883
4	0.656383	0.709558	3.10561	32.8911	95.0397
Raw data of relative expression of Vdr
	0day	2day	4day	6day	8day
1	0.91639	0.401466	2.32701	1.72386	1.57837
2	0.902213	0.406431	2.11134	1.59965	1.56467
3	1.1048	0.433117	2.10505	2.1471	1.62777
4	1.0766	0.394016	2.22329	1.77363	1.6006
Raw data of relative expression of Cidea
	0day	2day	4day	6day	8day
1	0.985136	30.8701	932.373	2894.01	1962.37
2	1.31386	25.2249	791.124	2495.87	1779.39
3	0.86485	23.2384	789.598	2638.88	2195.23
4	0.836156	27.5118	880.23	2761.71	2060.15
Raw data of relative expression of Pparg
	0day	2day	4day	6day	8day
1	0.722836	3.33047	14.4624	20.6905	12.6038
2	1.07367	3.18536	15.9832	23.363	12.4999
3	1.09789	3.66808	16.5005	28.5367	14.9958
4	1.1056	3.86707	17.0492	25.4368	14.79
Raw data of relative expression of Ppara
	0day	2day	4day	6day	8day
1	1.50963	2.2578	22.7153	58.8696	61.5681
2	1.05872	2.53305	20.4841	54.7965	57.6461
3	0.694136	2.83607	22.9984	62.058	61.32
4	0.73751	2.91529	24.0828	66.2836	61.902
Raw data of relative expression of Fgf21
	0day	2day	4day	6day	8day
1	0.581852	61.5032	22.3114	53.3106	92.6317
2	1.45879	47.064	16.3748	57.6741	98.3096
3	1.15459	47.7618	11.5407	46.9847	105.082
4	0.804774	58.7664	22.9857	60.2718	111.72

## Sheet: Figure 2
Figure 2C
Raw data of relative expression of Fabp4
	siCT	siVDR
1	0.988003	0.0939144
2	0.977526	0.102011
3	1.03447	0.0921826
Raw data of relative expression of Plin
	siCT	siVDR
1	0.952602	0.141714
2	1.02984	0.149672
3	1.01755	0.144592
Raw data of relative expression of Ucp1
	siCT	siVDR
1	0.884202	0.00571669
2	1.09921	0.00577048
3	1.01659	0.00541032

## Sheet: Figure 3
Figure 3B
Raw data of OilredO measurement
	0	100pM	1000pM
1	0.2	0.171	0.079
2	0.164	0.171	0.058
3	0.186	0.165	0.069
4	0.184	0.166	0.044
Figure 3C
	1α25D3 (pM)
	0	100	250	500	750	1000
1	1.01764	0.832788	0.673265	0.458749	0.327109	0.264215
2	0.873514	0.869811	0.628538	0.534395	0.380296	0.276677
3	1.10884	0.913056	0.668291	0.578789	0.389571	0.284157
Figure 3D
Raw data of relative cell viability of predifferentiated cells
	0	100pM	1000pM
1	100.251	94.894	72.9632
2	100.084	100.419	76.981
3	98.7444	100.419	73.6328
4	100.921	97.74	73.8002
Raw data of relative cell viability of differentiated cells
	0	100pM	1000pM
1	102.26	89.3983	59.5989
2	105.062	100.35	64.3107
3	99.8408	105.317	57.0519
4	92.8367	99.2041	63.8013

## Sheet: Figure 4
Figure 4A
Raw data of relative expression of Ucp1
	1α25D3 (pM)
	0	10	50	100	250	500	750	1000
1	0.764603	1.30808	2.04415	2.77224	2.34663	0.756198	0.292752	0.353562
2	0.866842	1.43772	2.35936	2.3098	2.27186	1.25602	0.54746	0.273473
3	1.36855	1.30353	1.94594	2.40487	1.81847	1.29698	0.94336	0.528192
Figure 4C
Raw data of relative expression of Ucp1					Raw data of relative expression of Agt
	0	100pM	1000pM			0	100pM	1000pM
1	0.764603	2.77224	0.353562		1	0.840984	1.01144	0.334918
2	0.866842	2.3098	0.273473		2	1.17618	1.09657	0.362781
3	1.36855	2.40487	0.528192		3	0.982839	1.07383	0.422067
Raw data of relative expression of Prdm16					Raw data of relative expression of Fabp4
	0	100pM	1000pM			0	100pM	1000pM
1	0.714797	1.44629	0.759276		1	1.00165	1.01338	0.384371
2	1.20086	2.08728	1.02488		2	0.920511	0.939923	0.401341
3	1.08434	1.65784	1.22411		3	1.07784	0.961552	0.42437
Raw data of relative expression of Retn					Raw data of relative expression of Plin
	0	100pM	1000pM			0	100pM	1000pM
1	0.982786	0.898248	0.267001		1	1.01764	0.832788	0.264215
2	0.902636	0.957212	0.310308		2	0.873514	0.869811	0.276677
3	1.11458	0.912899	0.323081		3	1.10884	0.913056	0.284157
Figure 4D
Raw data of relative mtDNA copy number
	0	100pM
1	0.946283	1.0377
2	1.15156	1.14135
3	1.05544	1.07333
4	1.02348	1.02463
5	0.917667	0.941882
6	0.905568	0.914731
Figure 4E
Raw data of relative expression of Cox7a1					Raw data of relative expression of Cox8b
	0	100pM				0	100pM
1	0.97847	0.926912			1	0.89183	1.11938
2	0.962894	1.25777			2	1.09783	1.51734
3	1.05283	1.08994			3	1.03217	1.50198
4	1.04092	1.06698			4	1.02314	1.43124
5	0.991738	1.12091			5	0.968491	1.35264
6	0.973156	1.18757			6	0.986537	1.47168

## Sheet: Figure 5
Figure 5A
0-2 day
Raw data of relative expression of Ucp1					Raw data of relative expression of Fabp4					Raw data of relative expression of Plin
	0	100pM				0	100pM				0	100pM
1	0.90896	1.54332			1	1.03903	1.09185			1	0.876215	0.92981
2	1.0889	2.10809			2	0.984892	1.10091			2	1.19528	0.938991
3	1.00214	1.55919			3	0.976079	1.23778			3	0.928505	0.964787
2-7 day
Raw data of relative expression of Ucp1					Raw data of relative expression of Fabp4					Raw data of relative expression of Plin
	0	100pM				0	100pM				0	100pM
1	0.820827	1.05408			1	1.08989	0.981218			1	1.02181	1.0996
2	0.94983	1.02659			2	0.738682	1.02588			2	0.775137	1.125
3	1.51484	1.10117			3	1.05962	0.862347			3	1.03399	0.938678
4	0.714505	1.1223			4	1.11181	0.853388			4	1.16906	0.969682
Figure 5C
Raw data of relative expression of Prdm16					Raw data of relative expression of Pgc1a					Raw data of relative expression of Ppara
	0	100pM				0	100pM				0	100pM
1	1.1301	2.82379			1	1.12126	1.29987			1	1.10178	1.0774
2	1.37128	2.10309			2	1.05694	1.36568			2	1.07267	1.07072
3	0.595041	2.42396			3	0.975891	1.37084			3	0.979663	1.15442
4	0.903575	2.52739			4	0.845907	1.23421			4	0.845884	1.20702
Raw data of relative expression of Pparg					Raw data of relative expression of Cidea					Raw data of relative expression of C/ebpa
	0	100pM				0	100pM				0	100pM
1	0.985103	1.02788			1	0.991051	1.26772			1	0.972921	0.85975
2	1.26107	0.968911			2	1.00979	1.07422			2	1.00219	0.804136
3	0.862022	0.964288			3	0.974363	2.02923			3	1.00724	0.804117
4	0.8918	0.94418			4	1.0248	1.25345			4	1.01765	0.826325
Figure 5D
Raw data of relative expression of Pparg					Raw data of relative expression of C/ebpa					Raw data of relative expression of C/ebpb					Raw data of relative expression of C/ebpd
	0	100pM				0	100pM				0	100pM				0	100pM
1	0.808225	0.976944			1	0.97641	0.939963			1	1.04924	1.11708			1	0.931963	1.00339
2	1.10794	0.973406			2	0.999166	0.942307			2	0.987404	0.879882			2	1.04255	0.787596
3	1.08384	1.10175			3	1.02442	1.17664			3	0.96336	0.82397			3	1.02549	0.342086
Figure 5E
Luciferase activity
	0	100pM
1	0.904821	0.959158
2	1.04201	0.938483
3	1.02725	1.05423
4	1.02592	1.02692

## Sheet: Figure 6
Figure 6B
Raw data of relative expression of Fabp4						Raw data of relative expression of Plin						Raw data of relative expression of Adipoq
	0	100pM	1000pM				0	100pM	1000pM				0	100pM	1000pM
1	0.82852	1.16991	1.41082			1	1.01477	0.924537	0.725586			1	1.11993	0.990493	0.873512
2	1.16172	0.421964	0.519756			2	0.994418	0.909117	0.555205			2	0.883605	0.984375	0.571839
3	1.04993	1.15298	0.640589			3	0.986156	0.83157	0.626059			3	1.03482	0.828008	0.726873
4	0.959826	0.731898	0.752161			4	1.00466	0.91725	0.613795			4	0.961649	1.07179	0.731928
Figure 6C day2
Raw data of relative expression of PPARg						Raw data of relative expression of C/EBPa						Raw data of relative expression of C/EBPb
	0	100pM	1000pM				0	100pM	1000pM				0	100pM	1000pM
1	0.815752	0.95724	0.247863			1	1.02832	0.933142	0.289388			1	0.950875	1.09682	0.666931
2	1.18005	0.798836	0.253052			2	0.988346	0.966279	0.28451			2	0.860845	1.09793	0.721587
3	1.0674	1.00344	0.29583			3	0.997061	0.902396	0.201454			3	0.981942	0.930138	0.7287
4	0.936795	0.818098	0.262088			4	0.98627	0.887416	0.275999			4	1.20634	0.995436	0.820752
Figure 6D
Raw data of relative expression of PPARg
	1α25D3 (pM)
	0	100	250	500	750	1000
1	1.02446	1.05107	1.53554	1.6276	1.70444	1.95122
2	0.947859	1.19602	1.43212	1.66745	1.8881	1.89143
3	1.04971	1.23997	1.42252	1.66511	1.83999	2.00285
4	0.977967	1.33043	1.53493	1.68196	2.03716	1.91256
